# Supplementary material for: Dynamics and rheology of nonpolar bijels
Source: Royal Society of Chemistry journal article supplement (doi:10.1039/c5sm00994d), 2015-01-01
Supplement: c5sm00994d1.pdf [file c5sm00994d1.pdf]

Supplementary Information for

**Dynamics and rheology of nonpolar bijels**

Lian Bai, John Fruehwirth, Xiang Cheng<sup>\*</sup>, Christopher W. Macosko<sup>\*</sup>

Department of Chemical Engineering and Materials Science, University of Minnesota, Minneapolis,  
Minnesota, 55455, USA

Video SV1. Confocal microscopy image series showing images in different depths from surface into the depth of 25  $\mu\text{m}$  of the PS/PB/B-SNP (50/50/4.5) bijel. The total size of the image is 211 x 211  $\mu\text{m}^2$ .

Video SV2. Confocal microscopy image series showing the coalescence of the PS/PB (50/50 wt%) neat blend in 196s. The total size of the image is 130 x 130  $\mu\text{m}^2$ .

Video SV3. Confocal microscopy image series showing the coalescence of the PS/PB/B-SNP (50/50/0.5) bijel in 308s. The total size of the image is 130 x 130  $\mu\text{m}^2$ .

Video SV4. Confocal microscopy image series showing the coalescence of the PS/PB/B-SNP (50/50/2.0) bijel in 308s. The total size of the image is 130 x 130  $\mu\text{m}^2$ .

Video SV5. Confocal microscopy image series showing the coalescence of the PS/PB/B-SNP (50/50/4.5) bijel in 308s. The total size of the image is 130 x 130  $\mu\text{m}^2$ .
